# Supplementary material for: Interactions between non-structured domains of FG- and non-FG-nucleoporins coordinate the ordered assembly of the nuclear pore complex in mitosis
Source: bioRxiv or medRxiv preprint supplement (doi:10.1101/506469), 2019-07-04
Supplement: Supplementary file [file media-1.pdf]

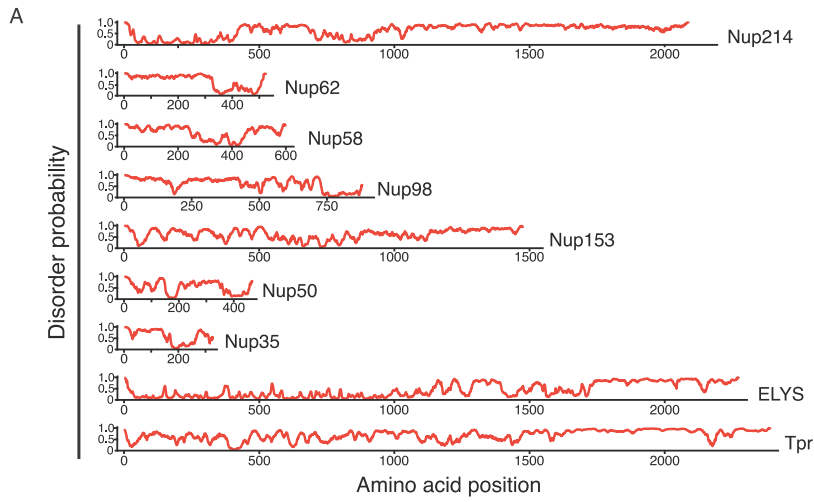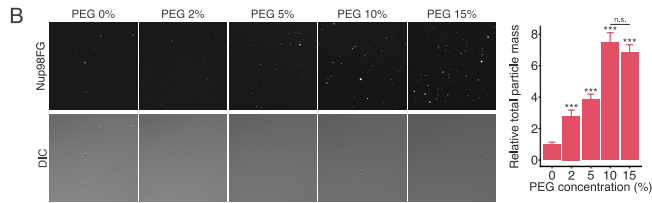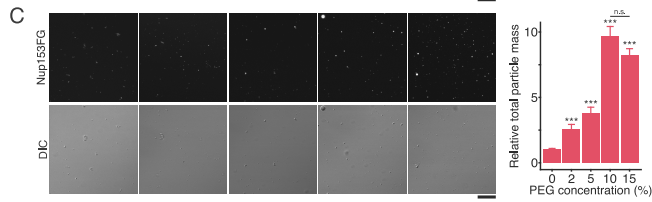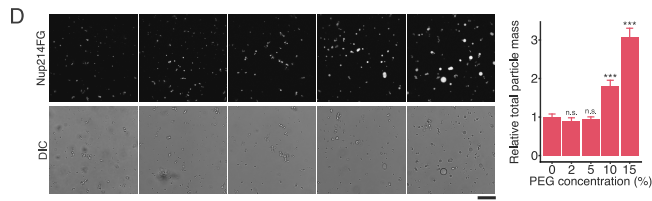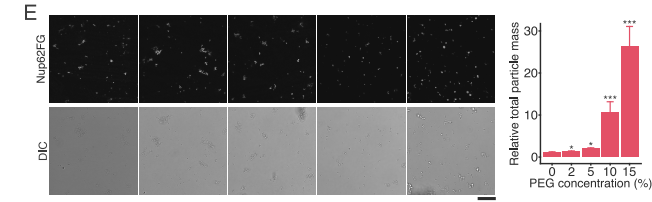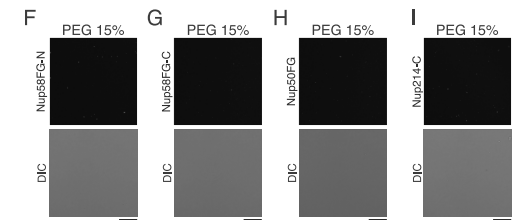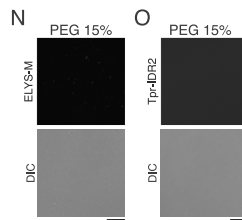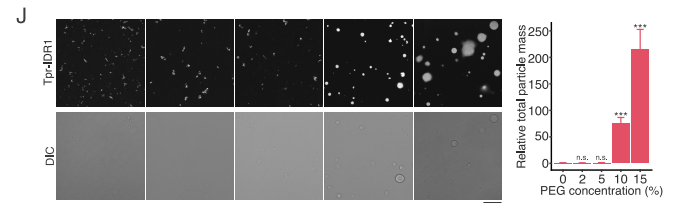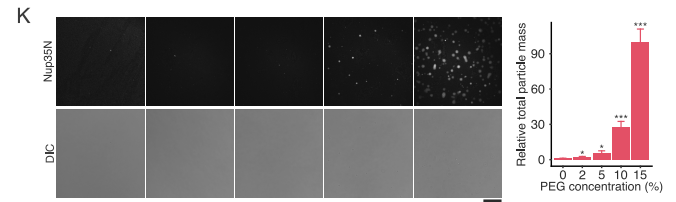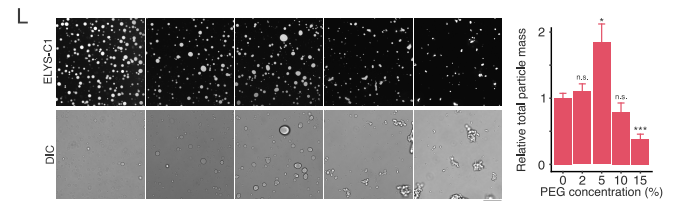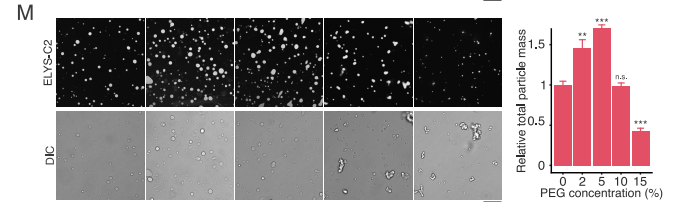

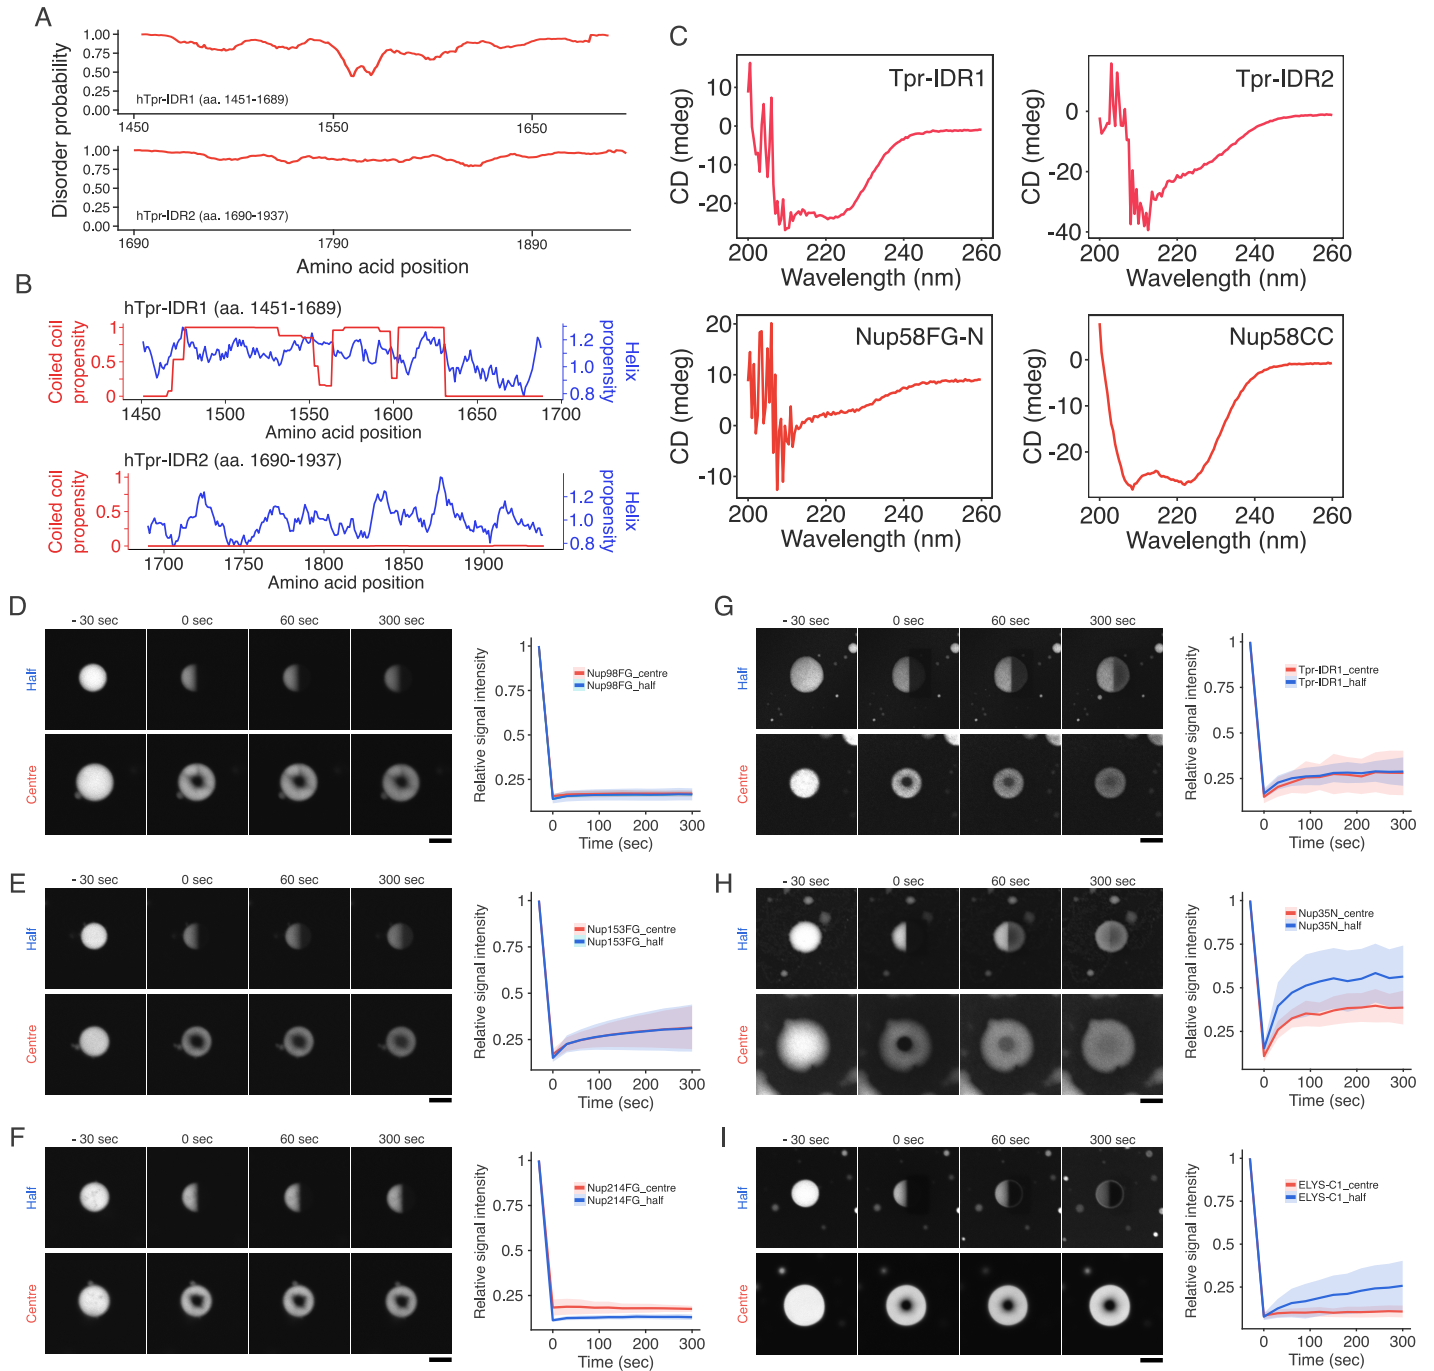

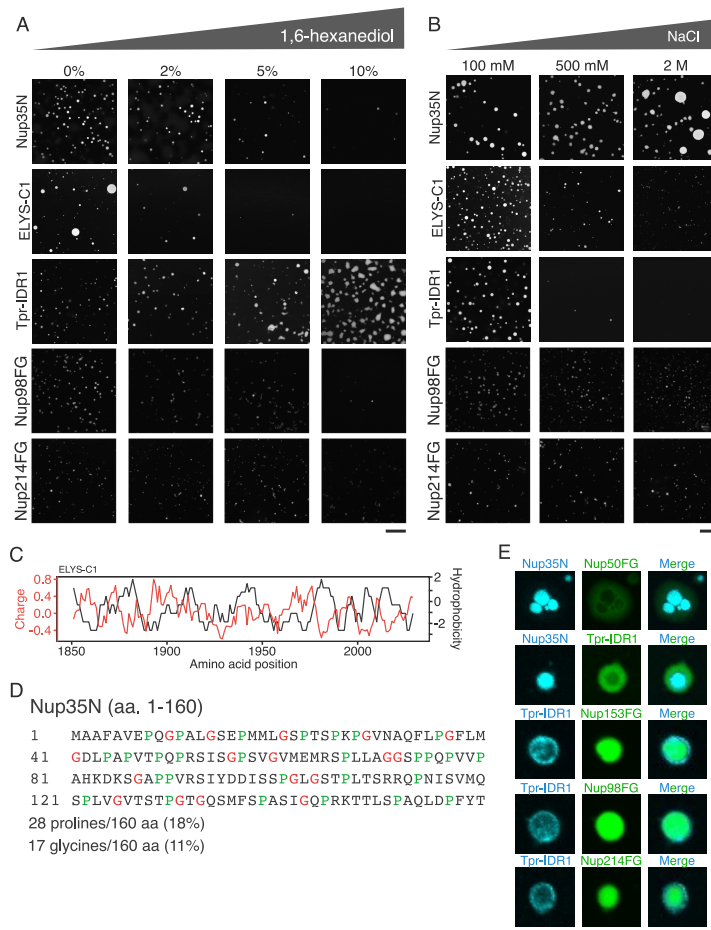

Konishi et al., Figure S3

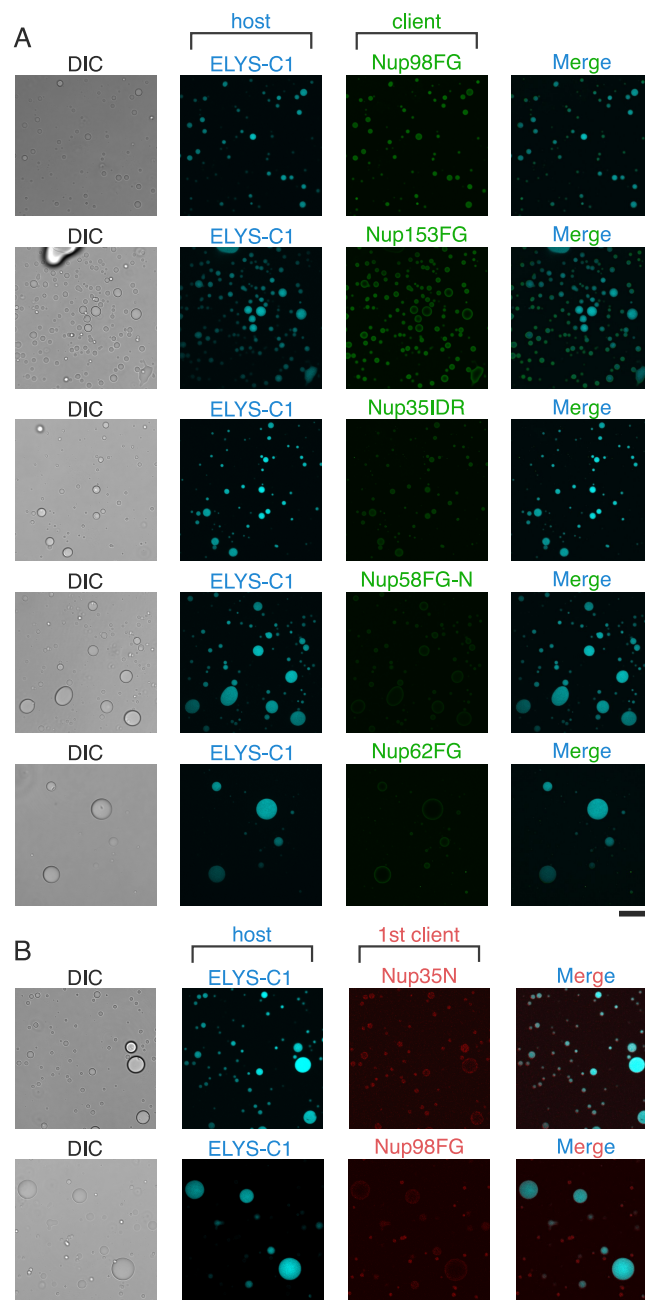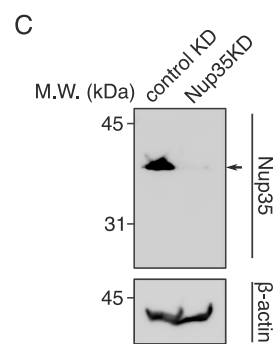

| Name       | Amino acid position | Molecular weight | Number of residues | Number of F, I, L, V, M, and P | Net charge | UniProt KB number |
|------------|---------------------|------------------|--------------------|--------------------------------|------------|-------------------|
| hNup98FG   | aa 214-480          | ≈ 26 kDa         | 267                | 24                             | 4          | P52948            |
| hNup153FG  | aa 1190-1464        | ≈ 28 kDa         | 275                | 27                             | 2          | P49790            |
| hNup214FG  | aa 1786-2090        | ≈ 30 kDa         | 305                | 23                             | 4.9        | P35658            |
| rNup62FG   | aa 1-268            | ≈ 28 kDa         | 268                | 25                             | 3          | P17955            |
| hNup58FG-C | aa 438-599          | ≈ 17 kDa         | 162                | 27                             | 9.9        | Q9BVL2            |
| hNup58FG-N | aa 1-250            | ≈ 25 kDa         | 250                | 24                             | 0          | Q9BVL2            |
| hNup214-C  | aa 1251-1550        | ≈ 31 kDa         | 300                | 30                             | -4.9       | P35658            |
| hNup50FG   | aa 1-145            | ≈ 16 kDa         | 145                | 25                             | 2          | Q9UKX7            |
| hNup35N    | aa 1-160            | ≈ 17 kDa         | 160                | 69                             | 4.1        | Q8NFH5            |
| hELYS-C1   | aa 1851-2033        | ≈ 21 kDa         | 183                | 47                             | 18.1       | Q8WYP5            |
| hELYS-C2   | aa 2034-2275        | ≈ 27 kDa         | 242                | 68                             | 21.2       | Q8WYP5            |
| hTpr-IDR1  | aa 1451-1689        | ≈ 27 kDa         | 239                | 53                             | -5.5       | P12270            |
| hELYS-M    | aa 1310-1559        | ≈ 27 kDa         | 250                | 73                             | -37.2      | Q8WYP5            |
| hTpr-IDR2  | aa 1690-1937        | ≈ 26 kDa         | 248                | 73                             | -25.8      | P12270            |

FG-Nups

IDR-Nups (non-FG-Nups)

Non-self-organized

Self-organized

Non-self-organized

Self-organized

Konishi HA et al., Table S1

| host<br>client | BSA                  | Nup214FG<br>-rich     | Nup214FG<br>-less    | Nup62FG              | Nup58FG-C             | Nup58FG-N            | Nup98FG              | Nup153FG             | Nup50FG              |
|----------------|----------------------|-----------------------|----------------------|----------------------|-----------------------|----------------------|----------------------|----------------------|----------------------|
| Nup214FG-rich  | 0.51±0.12<br>(n=275) | 1.55±0.34<br>(n=1467) | 0.81±0.33<br>(n=409) | 1.71±0.25<br>(n=826) | 0.76±0.29<br>(n=1371) | 1.00±0.22<br>(n=641) | 1.48±0.26<br>(n=571) | 1.56±0.33<br>(n=778) | 0.33±0.10<br>(n=171) |
| Nup62FG        | 0.67±0.17<br>(n=45)  | 1.71±0.25<br>(n=826)  | 1.30±0.17<br>(n=26)  | 1.62±0.27<br>(n=480) | 1.05±0.25<br>(n=361)  | 1.29±0.33<br>(n=274) | 1.58±0.32<br>(n=40)  | 1.67±0.36<br>(n=158) | 0.60±0.13<br>(n=59)  |
| Nup98FG        | 0.19±0.09<br>(n=211) | 1.48±0.26<br>(n=571)  | 1.24±0.27<br>(n=82)  | 1.58±0.32<br>(n=40)  | 0.73±0.26<br>(n=382)  | 1.52±0.29<br>(n=205) | 1.41±0.26<br>(n=615) | 1.28±0.29<br>(n=340) | 0.82±0.20<br>(n=62)  |
| Nup153FG       | 0.46±0.11<br>(n=182) | 1.56±0.33<br>(n=778)  | 0.94±0.24<br>(n=359) | 1.67±0.36<br>(n=158) | 1.28±0.33<br>(n=355)  | 1.53±0.25<br>(n=237) | 1.28±0.29<br>(n=340) | 1.48±0.23<br>(n=505) | 0.58±0.18<br>(n=214) |

| host<br>client | BSA                  | ELYS-C1              | Nup153FG             | Nup98FG              | Nup35IDR             | Nup58FG-N             | Nup50FG              | Nup62FG               | Nup214FG<br>-rich     | Tpr-IDR1             |
|----------------|----------------------|----------------------|----------------------|----------------------|----------------------|-----------------------|----------------------|-----------------------|-----------------------|----------------------|
| Tpr-IDR1       | 0.88±0.20<br>(n=59)  | 1.02±0.14<br>(n=536) | NA                   | NA                   | NA                   | 0.99±0.21<br>(n=109)  | 1.34±0.24<br>(n=205) | NA                    | NA                    | 1.17±0.20<br>(n=44)  |
| Nup35N         | 1.00±0.27<br>(n=66)  | 1.28±0.30<br>(n=920) | 1.59±0.26<br>(n=417) | 1.53±0.29<br>(n=88)  | 1.30±0.30<br>(n=538) | 1.28±0.24<br>(n=367)  | NA                   | 1.62±0.24<br>(n=787)  | 1.77±0.27<br>(n=1110) | NA                   |
| ELYS-C1        | 0.57±0.18<br>(n=215) | 1.57±0.29<br>(n=741) | 1.62±0.24<br>(n=704) | 1.23±0.27<br>(n=472) | 1.28±0.30<br>(n=920) | 1.13±0.22<br>(n=1951) | 0.57±0.15<br>(n=758) | 1.51±0.36<br>(n=1116) | 1.71±0.31<br>(n=1043) | 1.02±0.14<br>(n=536) |

Konishi HA et al., Table S2
